# Supplementary material for: Monsoonal influence on floating marine litter pathways in the Bay of Bengal
Source: Copernicus journal article supplement (doi:10.5194/os-21-1369-2025), 2025-07-15
Supplement: Supplementary file 1 [file os-21-1369-2025-supplement.zip]

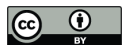

## *Supplement of*

# **Monsoonal influence on floating marine litter pathways in the Bay of Bengal**

**Lianne C. Harrison et al.**

*Correspondence to:* Lianne C. Harrison ([lianne.harrison@cefas.gov.uk](mailto:lianne.harrison@cefas.gov.uk))

- [os-21-1369-2025-supplement-title-page.pdf](#)
- [Supplementary\\_animations](#)
  - [BoB\\_all\\_countries\\_uniform\\_Cop\\_daily\\_Jun2018-Sept2019\\_full\\_year\\_fortnightly\\_cbfriendly.gif](#)
  - [BoB\\_all\\_countries\\_uniform\\_ROMS\\_daily\\_Jun2018-Sept2019\\_full\\_year\\_fortnightly\\_cbfriendly.gif](#)
  - [animation\\_captions.pdf](#)

The copyright of individual parts of the supplement might differ from the article licence.
