# Supplementary material for: Monsoonal influence on floating marine litter pathways in the Bay of Bengal
Source: Copernicus journal article supplement (doi:10.5194/os-21-1369-2025), 2025-07-15
Supplement: Supplementary file 2 [file os-21-1369-2025-supplement.zip]

CMEMS animation:

Trajectories of all particles released between 1<sup>st</sup> June 2018 - 31<sup>st</sup> May 2019 in the CMEMS simulation. Particles are colour-coded by country. Colour scale shows ocean current speed.

ROMS animation:

Trajectories of all particles released between 1<sup>st</sup> June 2018 - 31<sup>st</sup> May 2019 in the ROMS simulation. Particles are colour-coded by country. Colour scale shows ocean current speed.
